# Supplementary material
Source: PubMed Central journal article supplement (PMC4432174)
Supplement: AAC.05186-14_zac006154008so1.pdf [file AAC.05186-14_zac006154008so1.pdf]

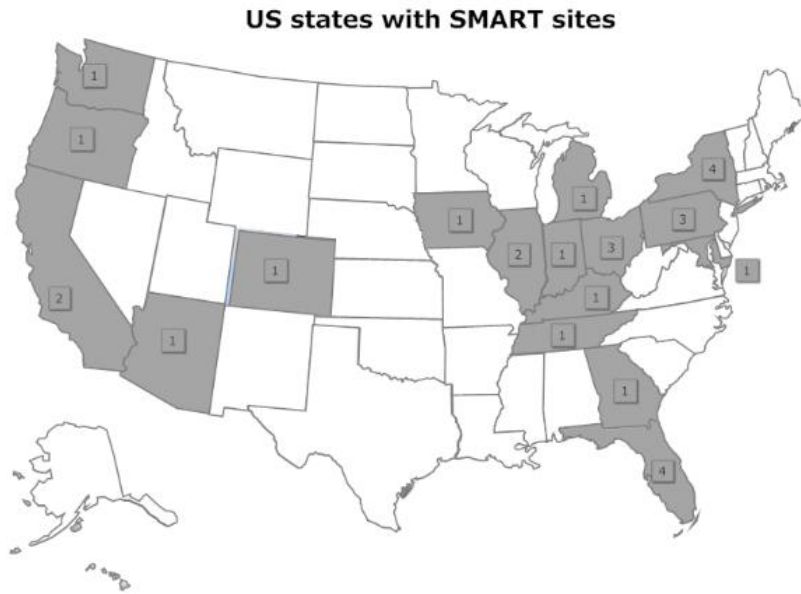

Figure S1. States with hospitals that participated in SMART between 2009 and 2013. Number of sites in each state are shown in the label.

Supplementary data.

Genomic DNA was extracted from overnight colonies grown on blood agar (Remel, Lenexa, KS) using the QIAamp DNA Mini Kit and the QIAcube instrument (Qiagen, Valencia, CA) according to the manufacturer's instructions. Genes encoding  $\beta$ -lactamases (*bla*) were detected using five separate multiplex PCR reactions: (1) *bla*<sub>TEM</sub>, *bla*<sub>SHV</sub>, *bla*<sub>VEB</sub>, *bla*<sub>PER</sub>, *bla*<sub>GES</sub>, and *bla*<sub>SPM</sub>; (2) *bla*<sub>IMP</sub>, *bla*<sub>VIM</sub>, *bla*<sub>OXA-48</sub>, *bla*<sub>NDM</sub>, and *bla*<sub>KPC</sub>; (3) *bla*<sub>ACC</sub>, *bla*<sub>ACT</sub>, *bla*<sub>MIR</sub>, *bla*<sub>CMY</sub>, *bla*<sub>MOX</sub>, *bla*<sub>DHA</sub>, and *bla*<sub>FOX</sub>; (4) *bla*<sub>CTX-M-1</sub>, *bla*<sub>CTX-M-2</sub>, and *bla*<sub>CTX-M-9</sub>; (5) *bla*<sub>CTX-M-8</sub> and *bla*<sub>CTX-M-25</sub>. Multiplex PCR reactions to detect all genes but *bla*<sub>CTX-M-8</sub> and *bla*<sub>CTX-M-25</sub> were performed using the Multiplex PCR kit (Qiagen), whereas the CTX-M-8/25 reaction was performed using the Fast Cycling PCR kit (Qiagen). All reactions were performed per the manufacturer's instructions using primers listed in Table S1. All genes were amplified for sequencing using the Fast Cycling PCR kit (Qiagen) per the manufacturer's instructions using primers listed in Table S1. Sanger sequencing of PCR amplicon was performed at ACGT, Inc. (Wheeling, IL). Sequence data was analyzed using SeqScape v.2.7 (Applied Biosystems) and compared to sequences available from the National Center for Biotechnology Information ([www.ncbi.nlm.nih.gov](http://www.ncbi.nlm.nih.gov)) and the Lahey Clinic ([www.lahey.org](http://www.lahey.org)).

*bla*<sub>SHV</sub> and *bla*<sub>TEM</sub> encoding SHV-type and TEM-type enzymes containing amino acid substitutions common to ESBLs (SHV G238S, G238A, E240K; TEM E104K, R164S, R164C, R164H, G238S) were identified by limited sequencing or by using the Check-MDR CT101 microarray (Check-Points B.V., Wageningen, the Netherlands). Full sequence was obtained only for *bla*<sub>SHV</sub> or *bla*<sub>TEM</sub> containing substitutions common to ESBLs. All other *bla* genes were sequenced in their entirety.

**Table S1. Primers used for multiplex PCR, gene amplification, and sequencing**

| Primer                                                | Sequence (5'- 3')     | Reference                        |
|-------------------------------------------------------|-----------------------|----------------------------------|
| <b>For <i>bla</i> gene detection by multiplex PCR</b> |                       |                                  |
| ACC-MF                                                | AACAGCCTCAGCAGCCGGTTA | Perez-Perez and Hanson, 2002 (1) |
| ACC-MR                                                | TTCGCCGCAATCATCCCTAGC | Perez-Perez and Hanson, 2002 (1) |
| CIT-MF (CMY-II)                                       | TGGCCAGAAGTACAGGCAAA  | Perez-Perez and Hanson, 2002 (1) |
| CIT-MR (CMY-II)                                       | TTTCTCCTGAACGTGGCTGGC | Perez-Perez and Hanson, 2002 (1) |
| CTX-M1-F2                                             | AAAAATCACTGCGCCAGTTC  | Woodford <i>et al</i> , 2006 (2) |
| CTX-M1-R2                                             | AGCTTATTCATCGCCACGTT  | Woodford <i>et al</i> , 2006 (2) |
| CTX-M2-F2                                             | CGACGCTACCCCTGCTATT   | Woodford <i>et al</i> , 2006 (2) |

| Primer                                           | Sequence (5'- 3')          | Reference                         |
|--------------------------------------------------|----------------------------|-----------------------------------|
| CTX-M2-R2                                        | CCAGCGTCAGATTTTTTCAGG      | Woodford <i>et al</i> , 2006 (2)  |
| CTX-M8-A                                         | TCGCGTTAAGCGGATGATGC       | Woodford <i>et al</i> , 2006 (2)  |
| CTX-M25-A                                        | GCACGATGACATTCGGG          | Woodford <i>et al</i> , 2006 (2)  |
| CTX-M8/25-B                                      | AACCCACGATGTGGGTAGC        | Woodford <i>et al</i> , 2006 (2)  |
| CTX-M9-F2                                        | CAAAGAGAGTGCAACGGATG       | Woodford <i>et al</i> , 2006 (2)  |
| CTX-M9-R2                                        | ATTGGAAAGCGTTCATCACC       | Woodford <i>et al</i> , 2006 (2)  |
| DHA-MF                                           | AACTTTCACAGGTGTGCTGGGT     | Perez-Perez and Hanson, 2002 (1)  |
| DHA-MR                                           | CCGTACGCATACTGGCTTTGC      | Perez-Perez and Hanson, 2002 (1)  |
| EBC-MF (ACT/ MIR)                                | TCGGTAAAGCCGATGTTGCCG      | Perez-Perez and Hanson, 2002 (1)  |
| EBC-MR (ACT/ MIR)                                | CTTCCACTGCGGCTGCCAGTT      | Perez-Perez and Hanson, 2002 (1)  |
| FOX-MF                                           | AACATGGGGTATCAGGGAGATG     | Perez-Perez and Hanson, 2002 (1)  |
| FOX-MR                                           | CAAAGCGCGTAACCGGATTGG      | Perez-Perez and Hanson, 2002 (1)  |
| GES-F                                            | AGTCGGCTAGACCGGAAAG        | Dallenne <i>et al</i> , 2010 (3)  |
| GES-R                                            | TTTGTCCGTGCTCAGGAT         | Dallenne <i>et al</i> , 2010 (3)  |
| IMP2-F                                           | GGAATAGAGTGGCTTAAYTCTC     | Poirel <i>et al</i> , 2011 (4)    |
| IMP2-R2                                          | GGTTTAAAYAAAACAACCACC      | Poirel <i>et al</i> , 2011 (4)    |
| KPCy-F                                           | TGTCACTGTATCGCCGTC         | Yigit <i>et al</i> , 2001 (5)     |
| KPCy-R                                           | CTCAGTGCTCTACAGAAAACC      | Yigit <i>et al</i> , 2001 (5)     |
| MOX-MF                                           | GCTGCTCAAGGAGCACAGGAT      | Perez-Perez and Hanson, 2002 (1)  |
| MOX-MR                                           | CACATTGACATAGGTGTGGTGC     | Perez-Perez and Hanson, 2002 (1)  |
| NDM-F                                            | CCGTATGAGTGATTGCGGCG       | Lascols <i>et al</i> , 2011 (6)   |
| NDM-R                                            | GCCCAATATTATGCACCCGG       | Lascols <i>et al</i> , 2011 (6)   |
| OXA-48-F                                         | GCTTGATCGCCCTCGATT         | Dallenne <i>et al</i> , 2010 (3)  |
| OXA-48-R                                         | GATTTGCTCCGTGGCCGAAA       | Dallenne <i>et al</i> , 2010 (3)  |
| PER-F                                            | GCTCCGATAATGAAAGCGT        | Dallenne <i>et al</i> , 2010 (3)  |
| PER-R                                            | TTCGGCTTGACTCGGCTGA        | Dallenne <i>et al</i> , 2010 (3)  |
| SHV-5                                            | CCTTTAAAGTAGTGCTCTGC       | This study                        |
| SHV-6                                            | TTCGCTGACCGGCGAGTAGT       | This study                        |
| SPM-F                                            | AAAATCTGGGTACGCAAACG       | Ellington <i>et al</i> , 2007 (7) |
| SPM-R                                            | ACATTATCCGCTGGAACAGG       | Ellington <i>et al</i> , 2007 (7) |
| TEM-3                                            | CATTTCCGTGTGCCCTTATTC      | Dallenne <i>et al</i> , 2010 (3)  |
| TEM-4                                            | CGTTCATCCATAGTTGCCTGAC     | Dallenne <i>et al</i> , 2010 (3)  |
| VEB-F                                            | CATTTCCCGATGCAAAGCGT       | Dallenne <i>et al</i> , 2010 (3)  |
| VEB-R                                            | CGAAGTTTCTTTGGACTCTG       | Dallenne <i>et al</i> , 2010 (3)  |
| VIM-F                                            | GATGGTGTGGTGCATA           | Ellington <i>et al</i> , 2007 (7) |
| VIM-R                                            | CGAATGCGCAGCACCAG          | Ellington <i>et al</i> , 2007 (7) |
| <b>For bla gene amplification and sequencing</b> |                            |                                   |
| CMY2-seqF                                        | ATGATGAAAAAATCGTTATGCTGCGC | This study                        |
| CMY2-seqR                                        | TTATTGCAGCTTTTCAAGAATGCGC  | This study                        |
| CMY2int-seqF                                     | GCAATGACCAGACGCGTC         | This study                        |
| CMY2int-seqR                                     | GACGCGTCTGGTCATTGC         | This study                        |
| CTX-M1c-F                                        | GACTATTCATGTTGTTGTTATTTTC  | Mena <i>et al</i> , 2006 (8)      |
| CTX-M1c-R                                        | TTACAAACCGTTGGTGACG        | Mena <i>et al</i> , 2006 (8)      |
| CTX-M1-R2                                        | AGCTTATTCATCGCCACGTT       | Woodford <i>et al</i> , 2006 (2)  |
| CTX-M-1int Fseq                                  | GACAGCTGGGAGACGAAACGTTTC   | This study                        |

| Primer        | Sequence (5'- 3')       | Reference                        |
|---------------|-------------------------|----------------------------------|
| KPCy-F        | TGTCACTGTATCGCCGTC      | Yigit <i>et al</i> , 2001 (5)    |
| KPCy-R        | CTCAGTGCTCTACAGAAAACC   | Yigit <i>et al</i> , 2001 (5)    |
| KPCint-Fseq   | CGCCAATTTGTTGCTGAAGGAG  | This study                       |
| KPCint-Rseq   | ACGTGGTATCGCCGATAGAGC   | This study                       |
| SHV-seqF2     | ATGCGTTATATTCGCCTGTGT   | This study                       |
| SHV-seqR      | TTAGCGTTGCCAGTGCTCG     | This study                       |
| SHVint-seqF   | GATCGGCGACAACGTCAC      | This study                       |
| SHVint-seqR   | GTGACGTTGTCGCCGATC      | This study                       |
| TEM-3         | CATTTCCGTGTGCCCTTATTC   | Dallenne <i>et al</i> , 2010 (3) |
| TEM2-extended | TTACCAATGCTTAATCAGTGAGG | This study                       |
| TEMint-seqF   | GTGCTGCCATAACCATGAGTG   | This study                       |
| TEMint-seqR   | CACTCATGGTTATGGCAGCAC   | This study                       |

1. Perez-Perez FJ and Hanson ND. Detection of plasmid-mediated AmpC beta-lactamase genes in clinical isolates by using multiplex PCR. *J Clinical Microbiol* 2002; 40: 2153-2162.
2. Woodford N, Fagan, EJ, Ellington MJ. Multiplex PCR for rapid detection of genes encoding CTX-M extended-spectrum beta-lactamases. *J Antimicrob Chemother* 2006; 57:154-155.
3. Dallenne C, Da Costa A, Decre D, *et al*. Development of a set of multiplex PCR assays for the detection of genes encoding important beta-lactamases in *Enterobacteriaceae*. *J Antimicrob Chemother* 2010; 65: 490-495.
4. Poirel L, Walsh TR, Cuvillier V, *et al*. Multiplex PCR for detection of acquired carbapenemase genes. *Diagnos Microb Inf Dis* 2011; 70: 119-123.
5. Yigit H, Queenan AM, Anderson GJ, *et al*. Novel carbapenem-hydrolyzing beta-lactamase, KPC-1, from a carbapenem-resistant strain of *Klebsiella pneumoniae*. *Antimicrob Agents Chemother* 2001; 45:1151-1161.
6. Lascols C, Hackel M, Marshall SH, *et al*. Increasing prevalence and dissemination of NDM-1 metallo- $\beta$ -lactamase in India: data from the SMART study (2009). *J Antimicrob Chemother* 2011; 9: 1992-1997.
7. Ellington MJ, Kistler J, Livermore DM, *et al*. Multiplex PCR for rapid detection of genes encoding acquired metallo-beta-lactamases. *J Antimicrob Chemother* 2007; 59: 321-322.

8. Mena A, Plasencia V, Garcia L, et al. Characterization of a large outbreak by CTX-M-1-producing *Klebsiella pneumoniae* and mechanisms leading to *in vivo* carbapenem resistance development. *J Clin Microbiol* 2006; 44: 2831-2837.
